# Supplementary material for: Hydrothermal synthesis of B, S, and N-doped carbon quantum dots for colorimetric sensing of heavy metal ions
Source: Royal Society of Chemistry journal article supplement (doi:10.1039/d4ra00397g), 2024-01-01
Supplement: d4ra00397g1.pdf [file d4ra00397g1.pdf]

## Supporting Information

### Hydrothermal Synthesis of B, S, and N-Doped Carbon Quantum Dots for Colorimetric Sensing of Heavy Metal Ions

Aysenur Aygun<sup>1</sup>, Ipek Cobas<sup>1</sup>, Rima Nour Elhouda Tiri<sup>1</sup>, Fatih Sen<sup>1\*</sup>

<sup>1</sup>Sen Research Group, Department of Biochemistry, Dumlupinar University, 43000 Kutahya, Turkey

\*Corresponding Author: fatihsen1980@gmail.com

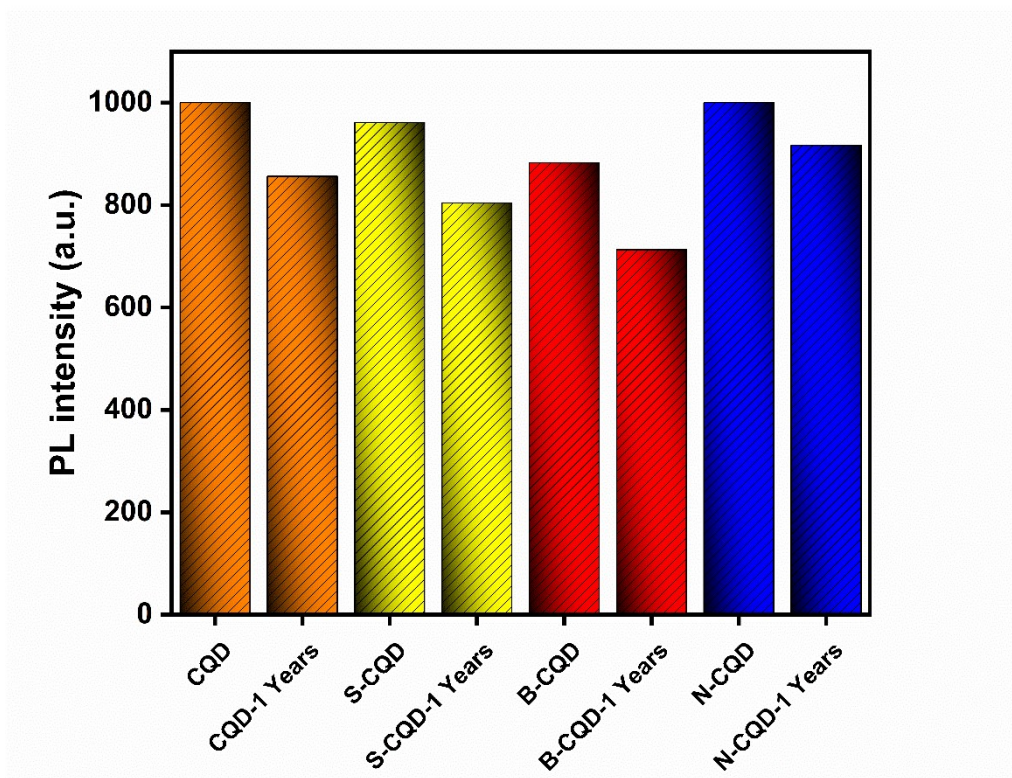

**Figure S1.** Fluorescence intensity stability of CQDs, S-CQDs, B-CQDs, N-CQDs.
